# Supplementary material for: The oomycete Lagenisma coscinodisci hijacks host alkaloid synthesis during infection of a marine diatom
Source: PubMed Central journal article supplement (PMC6821873; doi:10.1038/s41467-019-12908-w), 2019-10-30
Supplement: 41467_2019_12908_MOESM1_ESM.pdf [file 41467_2019_12908_MOESM1_ESM.pdf]

## **Supplementary information**

The oomycete *Lagenisma coscinodisci* hijacks host -alkaloids synthesis during infection of a marine diatom

Vallet et al.

**Supplementary Table 1.** Infection assessment of cells treated with filtrate from infected cultures (treatment) and untreated cells (control) over 4 days of incubation. The average infection rate (mean) and standard error (SE) were determined for biological triplicates (n = 3).

|       | Control  |      | Treatment |     |
|-------|----------|------|-----------|-----|
|       | Mean (%) | SE   | Mean (%)  | SE  |
| Day 1 | 5.1      | 0.4  | 17.1      | 1.8 |
| Day 2 | 12.9     | 0.6  | 22.4      | 2.1 |
| Day 3 | 34.4     | 11.0 | 47.9      | 3.4 |
| Day 4 | 92.8     | 2.4  | 92.1      | 2.5 |

**Supplementary Table 2.** Sample list with running order of the LC-MS sequence. Cell density was determined in a Sedgewick Rafter counting chamber. CG: *C. granii*. The average cell count was 316, 24 and 354 for exposed (n = 6), infected (n = 6) and healthy (n = 12) conditions, respectively. ANOVA on ranks found a significant difference between the cell count of the treatment (H=18,405 dF= 2, p-value < 0.001). The Dunn's procedure to compare multiple groups showed that infected vs healthy cell counts differed statistically (difference of ranks = 14, Q = 4, p-value < 0.05).

| Sequence order | Sample name        | Condition               | Co-culture chamber Number | Cell density (cells.mL <sup>-1</sup> ) | Normalization factor |
|----------------|--------------------|-------------------------|---------------------------|----------------------------------------|----------------------|
| 1              | blank_methanol     |                         |                           |                                        |                      |
| 2              | 20171130_ma_f2     | Guillard's medium (f/2) |                           |                                        |                      |
| 3              | blank_methanol_2   |                         |                           |                                        |                      |
| 4              | blank_standard_mix |                         |                           |                                        |                      |
| 5              | 20171204_ma_3-4b   | Healthy CG              | cc4                       | 498                                    | 1.42                 |
| 6              | 20171204_ma_3-1b   | Healthy CG              | cc1                       | 529                                    | 1.34                 |
| 7              | blank_methanol_3   |                         |                           |                                        |                      |
| 8              | 20171204_ma_3-7b   | Infected CG             | cc7                       | 38                                     | 18.61                |
| 9              | 20171204_ma_3-11a  | Healthy (exposed) CG    | cc11                      | 331                                    | 2.14                 |
| 10             | blank_methanol_4   |                         |                           |                                        |                      |
| 11             | qc_1               |                         |                           |                                        |                      |
| 12             | 20171204_ma_3-4a   | Healthy CG              | cc4                       | 346                                    | 2.04                 |
| 13             | 20171204_ma_3-10b  | Infected CG             | cc10                      | 42                                     | 16.83                |
| 14             | blank_methanol_5   |                         |                           |                                        |                      |
| 15             | 20171204_ma_3-10a  | Healthy (exposed) CG    | cc10                      | 213                                    | 3.32                 |
| 16             | 20171204_ma_3-11b  | Infected CG             | cc11                      | 54                                     | 13.09                |
| 17             | blank_methanol_6   |                         |                           |                                        |                      |
| 18             | qc_2               |                         |                           |                                        |                      |
| 19             | 20171204_ma_3-12a  | Healthy (exposed) CG    | cc12                      | 324                                    | 2.18                 |
| 20             | 20171204_ma_3-9b   | Infected CG             | cc9                       | 57                                     | 12.40                |
| 21             | blank_methanol_7   |                         |                           |                                        |                      |
| 22             | 20171204_ma_3-8b   | Infected CG             | cc8                       | 25                                     | 28.28                |

|    |                   |                      |      |     |       |
|----|-------------------|----------------------|------|-----|-------|
| 23 | 20171204_ma_3-9a  | Healthy (exposed) CG | cc9  | 309 | 2.29  |
| 24 | blank_methanol_8  |                      |      |     |       |
| 25 | qc_3              |                      |      |     |       |
| 26 | 20171204_ma_3-5a  | Healthy CG           | cc5  | 363 | 1.95  |
| 27 | 20171204_ma_3-6a  | Healthy CG           | cc6  | 372 | 1.90  |
| 28 | blank_methanol_9  |                      |      |     |       |
| 29 | 20171204_ma_3-5b  | Healthy CG           | cc5  | 511 | 1.38  |
| 30 | 20171204_ma_3-12b | Infected CG          | cc12 | 24  | 29.46 |
| 31 | blank_methanol_10 |                      |      |     |       |
| 32 | qc_4              |                      |      |     |       |
| 33 | 20171204_ma_3-8a  | Healthy (exposed) CG | cc8  | 235 | 3.01  |
| 34 | 20171204_ma_3-2a  | Healthy CG           | cc2  | 707 | 1.00  |
| 35 | blank_methanol_11 |                      |      |     |       |
| 36 | 20171204_ma_3-7a  | Healthy (exposed) CG | cc7  | 328 | 2.16  |
| 37 | 20171204_ma_3-3a  | Healthy CG           | cc3  | 607 | 1.16  |
| 38 | blank_methanol_12 |                      |      |     |       |
| 39 | qc_5              |                      |      |     |       |
| 40 | 20171204_ma_3-2b  | Healthy CG           | cc2  | 561 | 1.26  |
| 41 | 20171204_ma_3-1a  | Healthy CG           | cc1  | 320 | 2.21  |
| 42 | blank_methanol_13 |                      |      |     |       |
| 43 | 20171204_ma_3-6b  | Healthy CG           | cc6  | 351 | 2.01  |
| 44 | 20171204_ma_3-3b  | Healthy CG           | cc3  | 641 | 1.10  |
| 45 | blank_methanol_14 |                      |      |     |       |
| 46 | blank_methanol_15 |                      |      |     |       |

**Supplementary Table 3.** Suggested structures of the up-regulated metabolites in infected cells, organized by their retention time (RT in minute). The metabolites are elucidated by HR-MS, MS<sup>2</sup> and library comparison. Metabolites with proven identity by comparison with analytical standards are indicated with (\*). LysoPC: lysophosphatidylcholine.

| RT  | [M+H] <sup>+</sup><br>Observed mass | Deviation<br>(ppm) | Compound<br>chemical<br>formula                               | Metabolite            | Identifier CHEBI<br>number | Diagnostic fragments<br>(m/z)                                             |
|-----|-------------------------------------|--------------------|---------------------------------------------------------------|-----------------------|----------------------------|---------------------------------------------------------------------------|
| 1.1 | 274.1869                            | 1.5                | C <sub>11</sub> H <sub>23</sub> N <sub>5</sub> O <sub>3</sub> | Arginyl-valine        | CHEBI:73823                | 215.0526, 70.0651                                                         |
| 1.3 | 338.1819                            | 0.9                | C <sub>15</sub> H <sub>23</sub> N <sub>5</sub> O <sub>4</sub> | Tyrosyl-arginine      | CHEBI:17537                | 175.1190, 58.1190,<br>112.0867                                            |
| 1.4 | 268.1036                            | 1.5                | C <sub>10</sub> H <sub>13</sub> N <sub>5</sub> O <sub>4</sub> | Adenosine*            | CHEBI:16335                | 136.0616                                                                  |
| 2.4 | 322.1869                            | 1.2                | C <sub>15</sub> H <sub>23</sub> N <sub>5</sub> O <sub>3</sub> | Arginyl-phenylalanine | CHEBI:73818                | 215.0526, 70.0651                                                         |
| 2.7 | 232.1401                            | 1.3                | C <sub>8</sub> H <sub>17</sub> N <sub>5</sub> O <sub>3</sub>  | Glycyl-arginine       | CHEBI:73860                | 158.0922, 16.0704,<br>112.0866                                            |
| 3.2 | 217.0969                            | 1.2                | C <sub>12</sub> H <sub>12</sub> N <sub>2</sub> O <sub>2</sub> | 4-CTC*                | CHEBI:91151                | 144.0804, 84.9595                                                         |
| 3.2 | 169.0758                            | 1.2                | C <sub>11</sub> H <sub>8</sub> N <sub>2</sub>                 | β-carboline*          | CHEBI:109895               | 142.0649, 115.0541                                                        |
| 3.8 | 260.1853                            | 1.2                | C <sub>13</sub> H <sub>25</sub> NO <sub>4</sub>               | Hexanoyl-carnitine    | CHEBI:70749                | 243.1701, 85.0283                                                         |
| 4.3 | 286.2009                            | 1.0                | C <sub>15</sub> H <sub>27</sub> NO <sub>4</sub>               | Octenoyl-carnitine    | CHEBI:71012                | 85.0283                                                                   |
| 6.4 | 542.3225                            | 3.0                | C <sub>28</sub> H <sub>48</sub> NO <sub>7</sub> P             | Lyso:PC (20:5)        | CHEBI:88686                | 483.2480, 39.2813,<br>184.0733, 46.9817,<br>104.1069, 86.0963,<br>60.0809 |
| 6.5 | 494.3231                            | 2.0                | C <sub>24</sub> H <sub>48</sub> NO <sub>7</sub> P             | Lyso:PC (16:1)        | CHEBI:64560                | 476.3134, 84.0731,<br>104.1068, 86.0963,<br>60.0809                       |
| 6.6 | 280.263                             | 1.4                | C <sub>18</sub> H <sub>33</sub> NO                            | Linoleamide*          | CHEBI:82984                | 263.2366, 245.2262                                                        |
| 6.9 | 520.3392                            | 1.0                | C <sub>26</sub> H <sub>50</sub> NO <sub>7</sub> P             | Lyso:PC (18:2)*       | CHEBI:64549                | 502.3394, 84.0731,<br>124.9996, 04.1068,<br>86.0963, 60.0809              |
| 6.9 | 568.3389                            | 1.4                | C <sub>30</sub> H <sub>50</sub> NO <sub>7</sub> P             | Lyso:PC (22:6)        | CHEBI:64567                | 550.3278, 84.0732,<br>124.9997, 04.1068,<br>86.0963, 60.0809              |
| 6.9 | 544.3386                            | 2.0                | C <sub>28</sub> H <sub>50</sub> NO <sub>7</sub> P             | Lyso:PC (20:4)        | CHEBI:64568                | 526.3297, 41.2847,<br>184.0733, 24.9998,<br>104.1069, 86.0964,<br>60.0810 |
| 7.2 | 233.1896                            | 1.3                | C <sub>16</sub> H <sub>24</sub> O                             | Ionone                | CHEBI:49248                | 177.1274, 21.1011,<br>93.0698                                             |
| 7.3 | 570.3543                            | 1.9                | C <sub>30</sub> H <sub>52</sub> NO <sub>7</sub> P             | Lyso:PC (22:5)        | CHEBI:74349                | 552.3448, 84.0731,<br>124.9997, 104.1068,<br>86.0963, 60.0809             |
| 7.4 | 468.3077                            | 1.5                | C <sub>22</sub> H <sub>46</sub> NO <sub>7</sub> P             | Lyso:PC (14:0)        | CHEBI:64483                | 450.3088, 84.0731,<br>104.1068, 86.0962,<br>58.0653                       |
| 9.9 | 581.3978                            | 1.9                | C <sub>40</sub> H <sub>52</sub> O <sub>3</sub>                | Phoenicoxanthin       | CHEBI:80216                | 563.3884, 109.1011                                                        |

**Supplementary Table 4.** Concentration of  $\beta$ -carboline and 4-CTC determined in the exudates of infected and healthy cultures of *C. granii* after solid phase extraction and quantification by UHPLC-HR-MS-MS.

| Sample code                        | Intensity for $\beta$ -carboline (a.u.) | Concentration of $\beta$ -carboline (pM) | Intensity for 4-CTC (a.u.) | Concentration of 4-CTC (pM) |
|------------------------------------|-----------------------------------------|------------------------------------------|----------------------------|-----------------------------|
| 20190803_CG_exudates_healthy_MV13  | 5.13E+05                                | <18.4                                    | 2.38E+04                   | <21.5                       |
| 20190803_CG_exudates_healthy_MV14  | 7.42E+05                                | <18.4                                    | 8.20E+04                   | <21.5                       |
| 20190803_CG_exudates_healthy_MV15  | 5.88E+05                                | <18.4                                    | 5.22E+04                   | <21.5                       |
| 20190803_CG_exudates_infected_MV10 | 2.75E+06                                | <18.4                                    | 1.49E+05                   | <21.5                       |
| 20190803_CG_exudates_infected_MV11 | 5.28E+06                                | 47.3                                     | 1.21E+05                   | <21.5                       |
| 20190803_CG_exudates_infected_MV12 | 5.98E+06                                | 55.9                                     | 8.02E+04                   | <21.5                       |

**Supplementary Figure 1.** Growth of cells treated with filtrate of the infected cultures (treatment) and cells grown in control medium (control). Error bars indicate the standard error of mean.

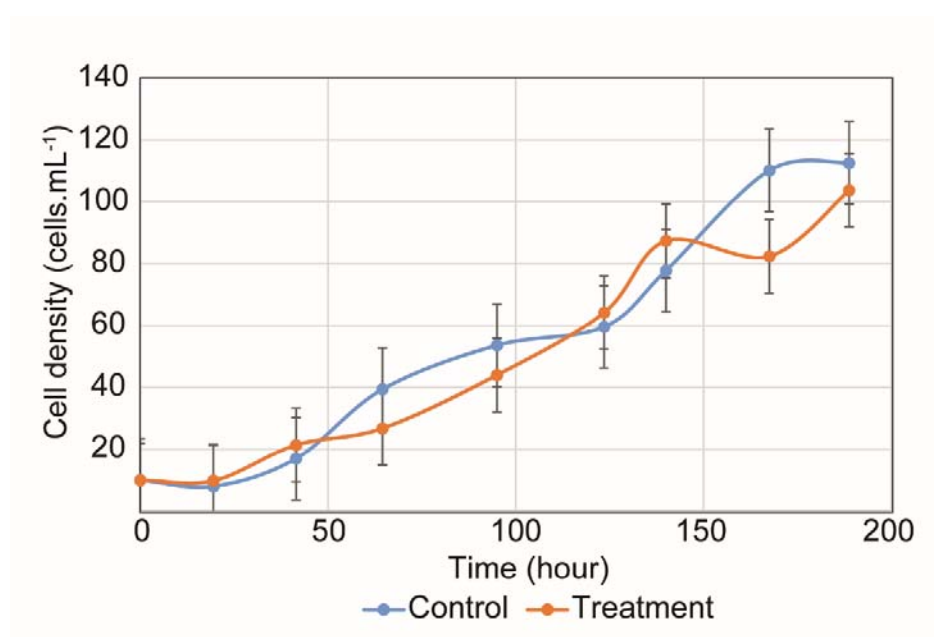

**Supplementary Figure 2.** a) Experimental setup depicting *C. granii* shells in methanol suspension which were deposited on HTC printed microscope glass slides, with highlights of surface area and shell area (left picture) and shells after laser abrasion (right picture). The intensity for  $\beta$ -carboline  $m/z$  169.0760 detected at 1 fg deposited for 26 diatom shells was 27.69 a.u.  $SD \pm 38.03$  (referred in the Source Data file). The calculated limits of detection and quantification for  $\beta$ -carboline were 3.4 and 10.2 fg per shell, respectively. b) MALDI-HR-MS spectra of a single cell of *C. granii* infected with oomycete *L. coscinodisci* and zooming into the  $m/z$  range 100 to 170 allows assigning the  $M+H^+$  and characteristic fragment ions of  $\beta$ -carboline in the infected cell.

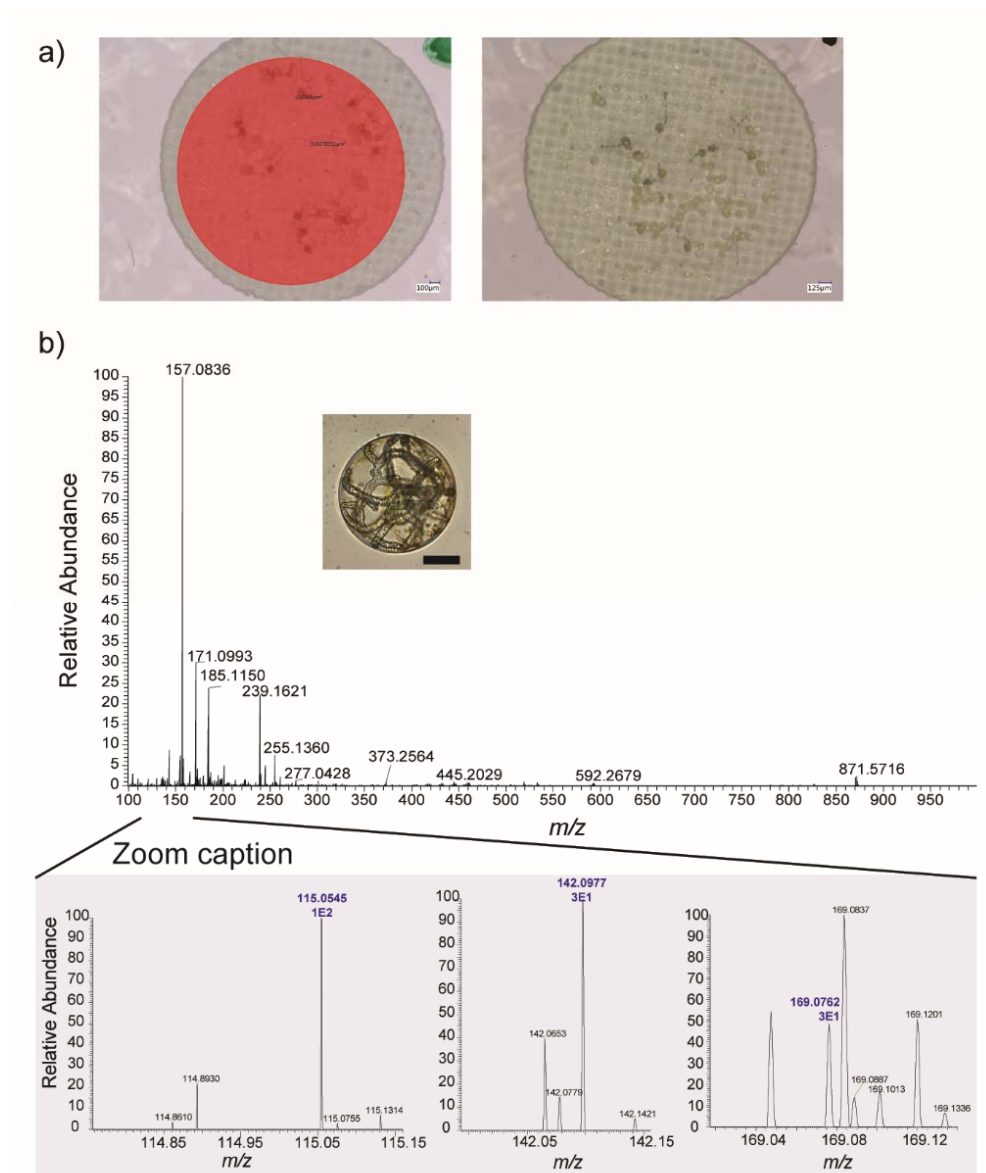

**Supplementary Figure 3.** Calibration curves for a) 4-CTC and b)  $\beta$ -carboline determined for absolute quantification with UHPLC-HR-MS/MS.

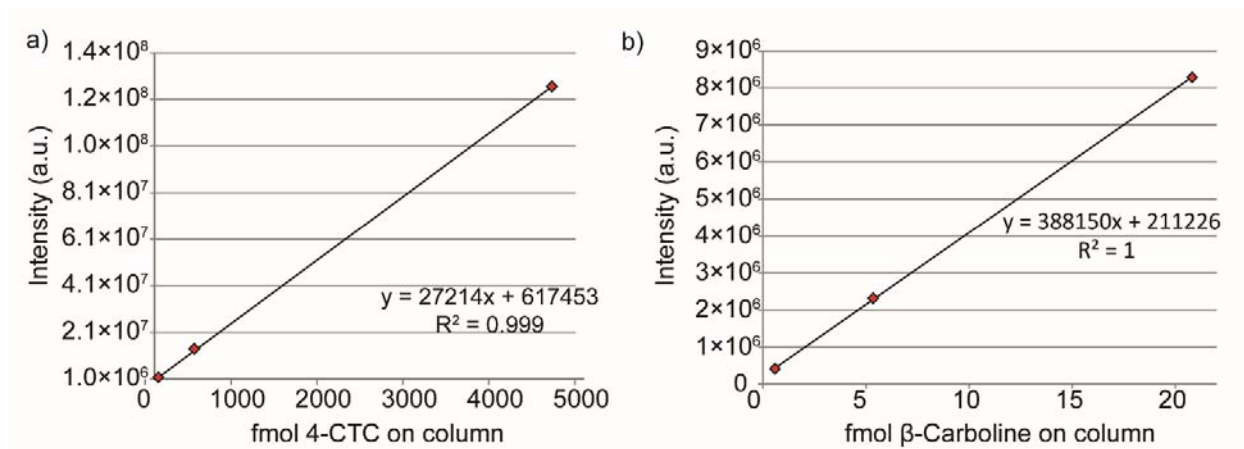

**Supplementary Figure 4.** Representative fluorescence spectra of the analytical standards chlorophyll *a*,  $\beta$ -carboline and 4-CTC recorded at an excitation of 405 nm.

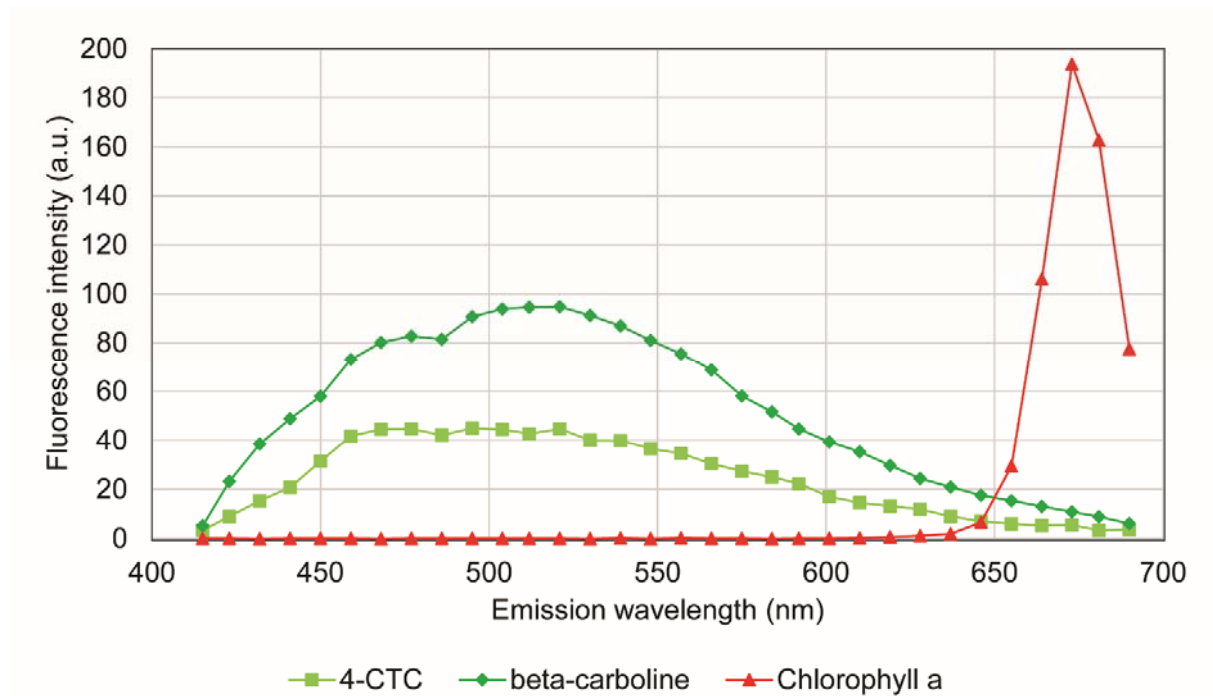

**Supplementary Figure 5.** Quantification by UHPLC-HR-MS/MS for a) 4-CTC and b)  $\beta$ -carboline determined after addition to axenic f/2 medium and extraction with solid phase extraction.

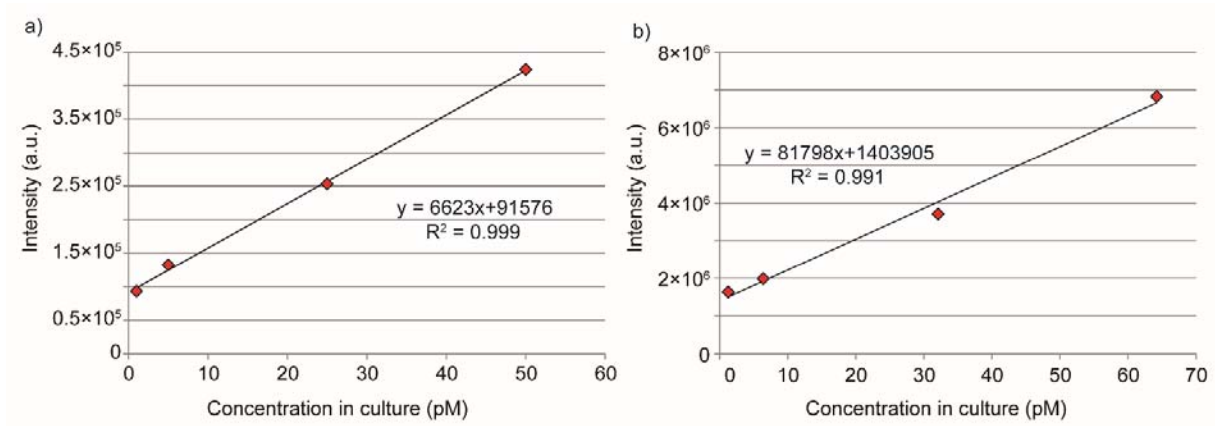



**Supplementary Figure 6.** MS/MS spectra, structure and ANOVA results for the identified metabolite 4-CTC a) in infected cell extract b) from analytical standard. The box-plots are displayed with the maximum, minimum, median lines and first/third quartiles and the samples as points.

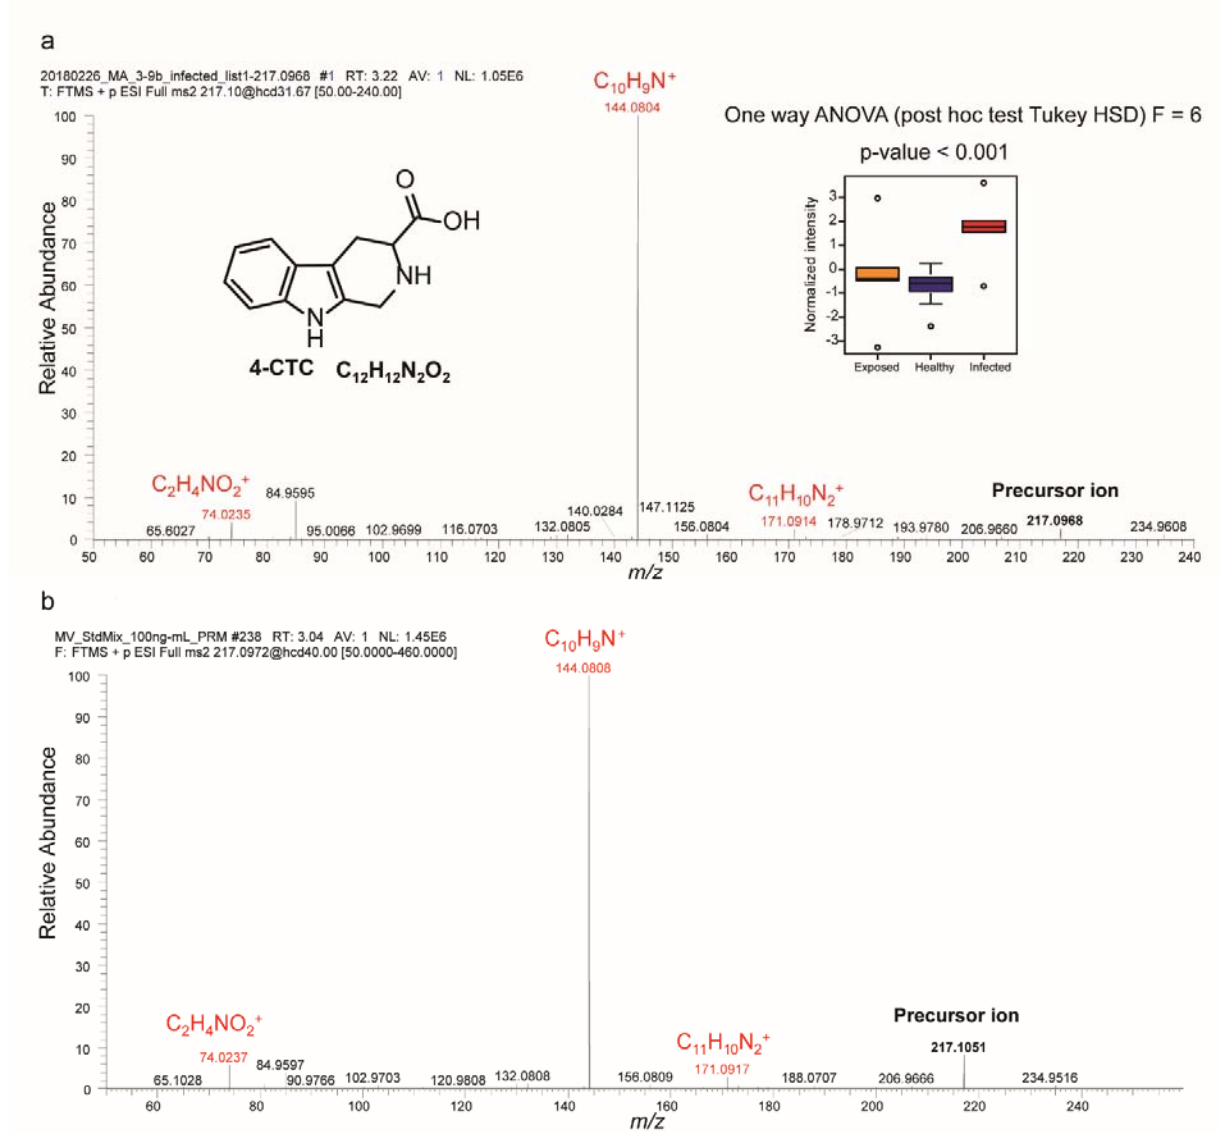

**Supplementary Figure 7.** MS/MS spectra, structure and ANOVA results for the identified metabolite  $\beta$ -carboline a) in infected cell extract b) from analytical standard. MS/MS characteristic fragments are supported by Crotti et al.<sup>1</sup> The box-plots are displayed with the maximum, minimum, median lines and first/third quartiles and the samples as points.

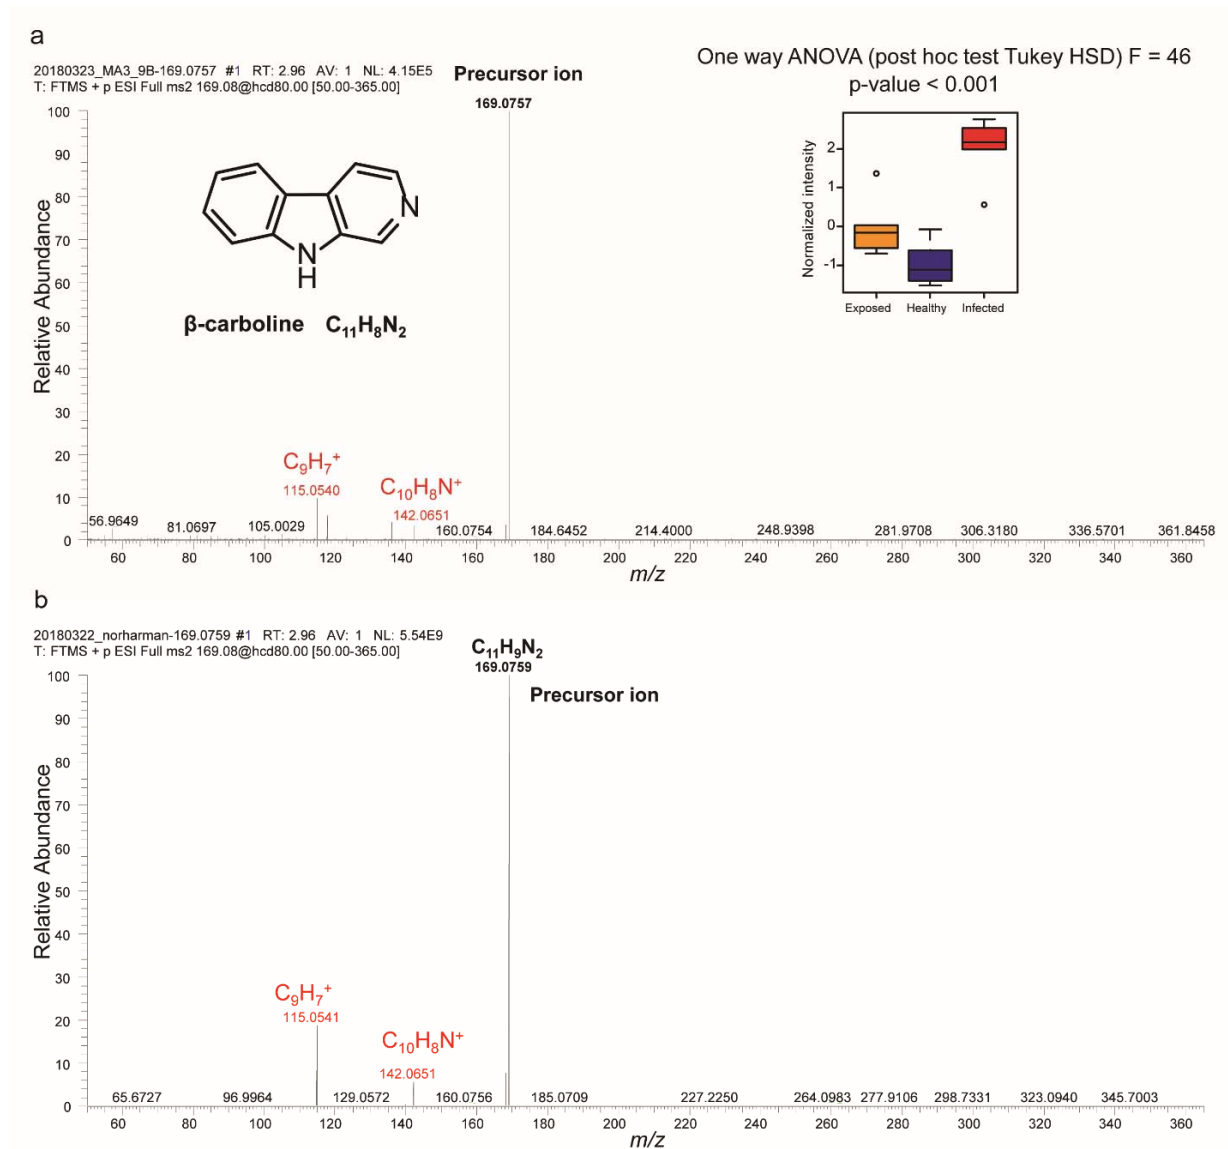

**Supplementary Figure 8.** MS/MS spectra, structure and ANOVA results for the identified metabolite linoleamide a) in infected cell extract b) from analytical standard. The box-plots are displayed with the maximum, minimum, median lines and first/third quartiles and the samples as points.

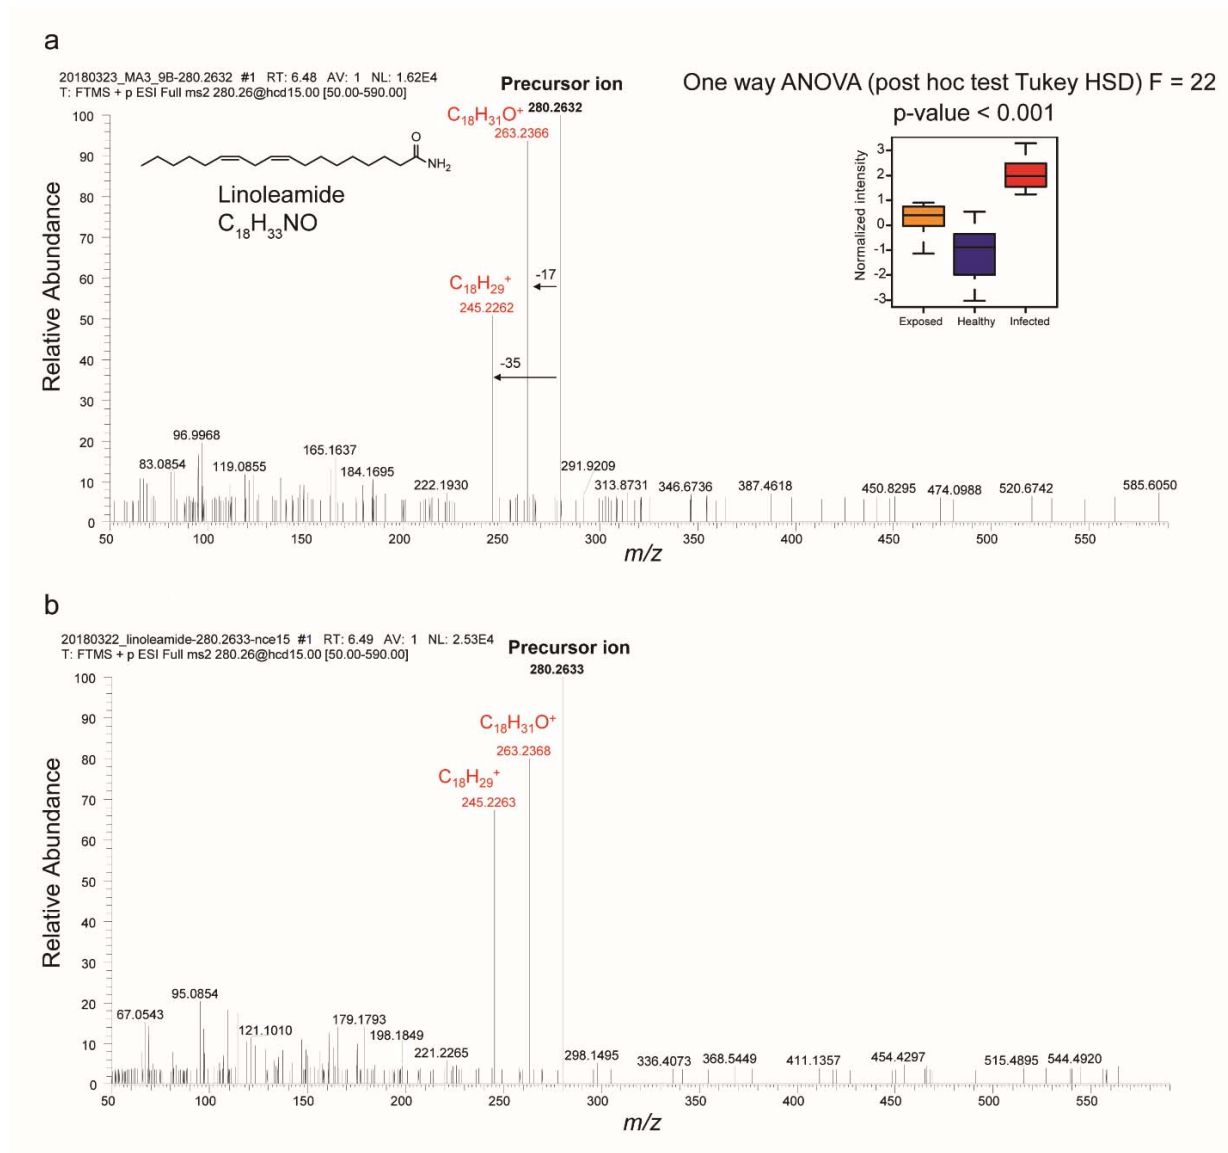

**Supplementary Figure 9.** MS/MS spectra, structure and ANOVA results for the identified dipeptides a) Arginyl-Phenylalanine b) Tyrosyl-arginine c) Arginyl-valine d) Glycyl-arginine. The box-plots are displayed with the maximum, minimum, median lines and first/third quartiles and the samples as points.

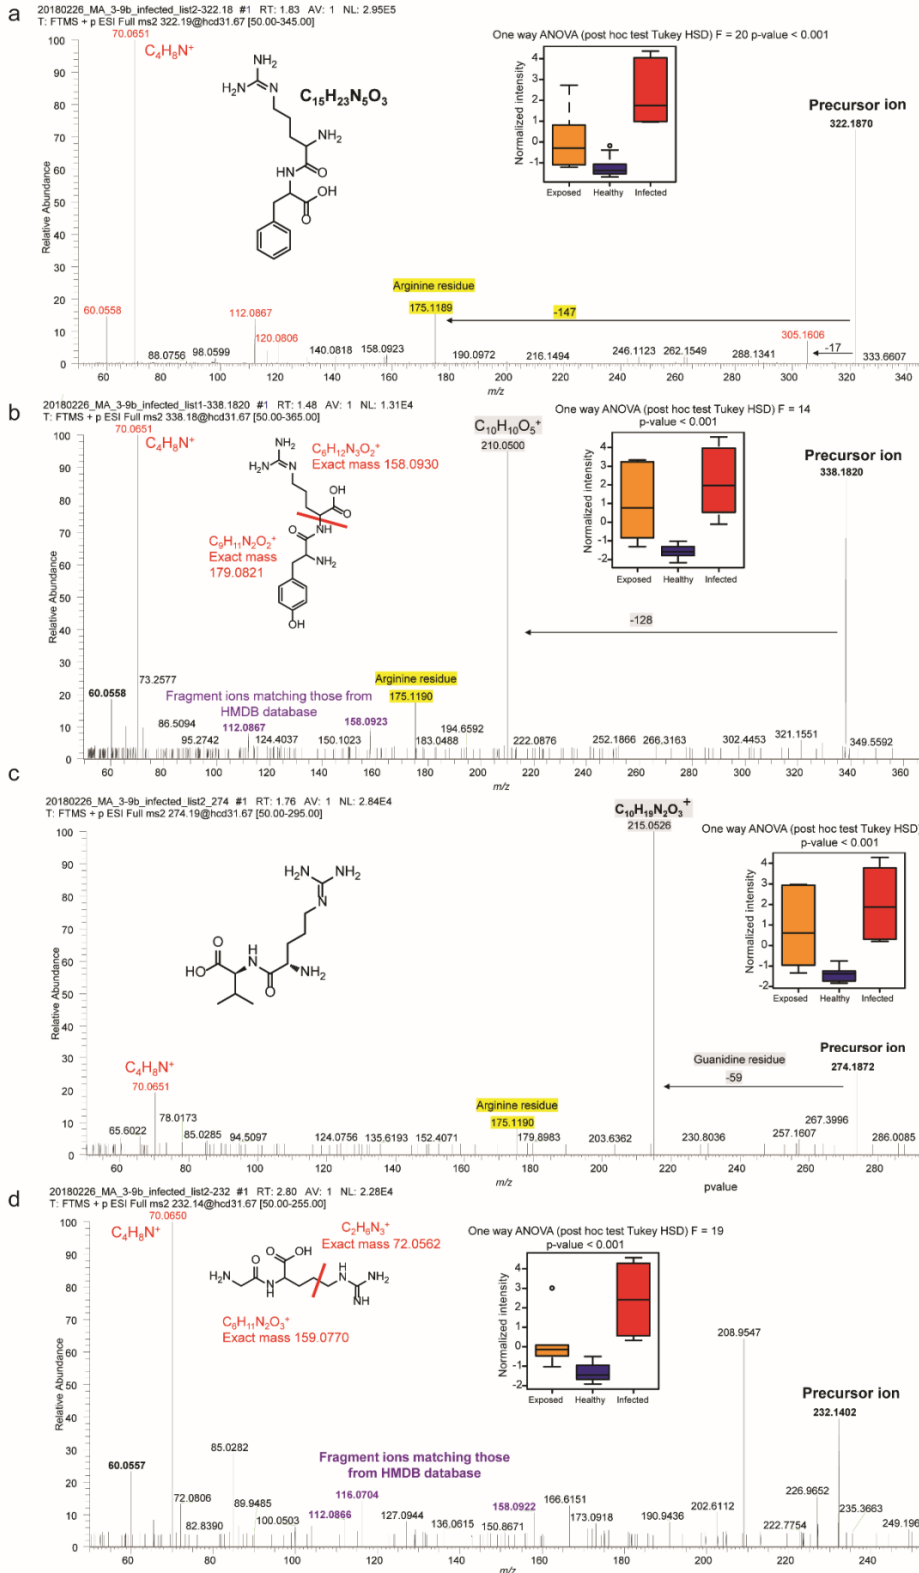

**Supplementary Figure 10.** MS/MS spectra and ANOVA result for the identified lysophosphatidylcholine a) in infected extract b) from analytical standard. MS/MS characteristic fragments are supported by Suarez-Garcia et al.<sup>2</sup> The box-plots are displayed with the maximum, minimum, median lines and first/third quartiles and the samples as points.

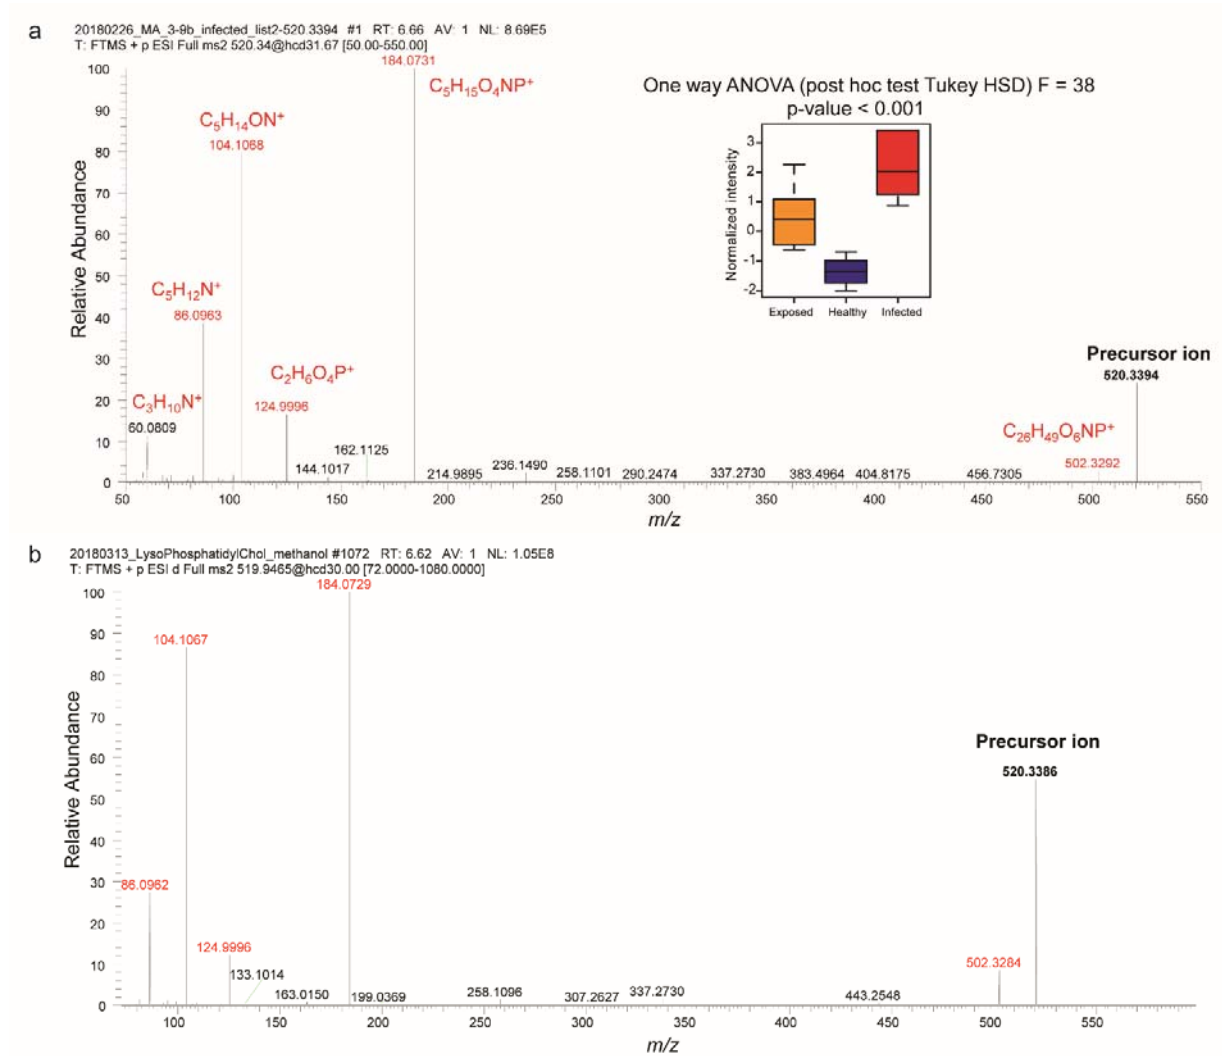

**Supplementary Figure 11.** MS/MS spectra from infected extract and ANOVA results for a) hexanoylcarnitine b) octanoylcarnitine. MS/MS characteristic fragments are supported by Cho et al.<sup>3</sup> The box-plots are displayed with the maximum, minimum, median lines and first/third quartiles and the samples as points.

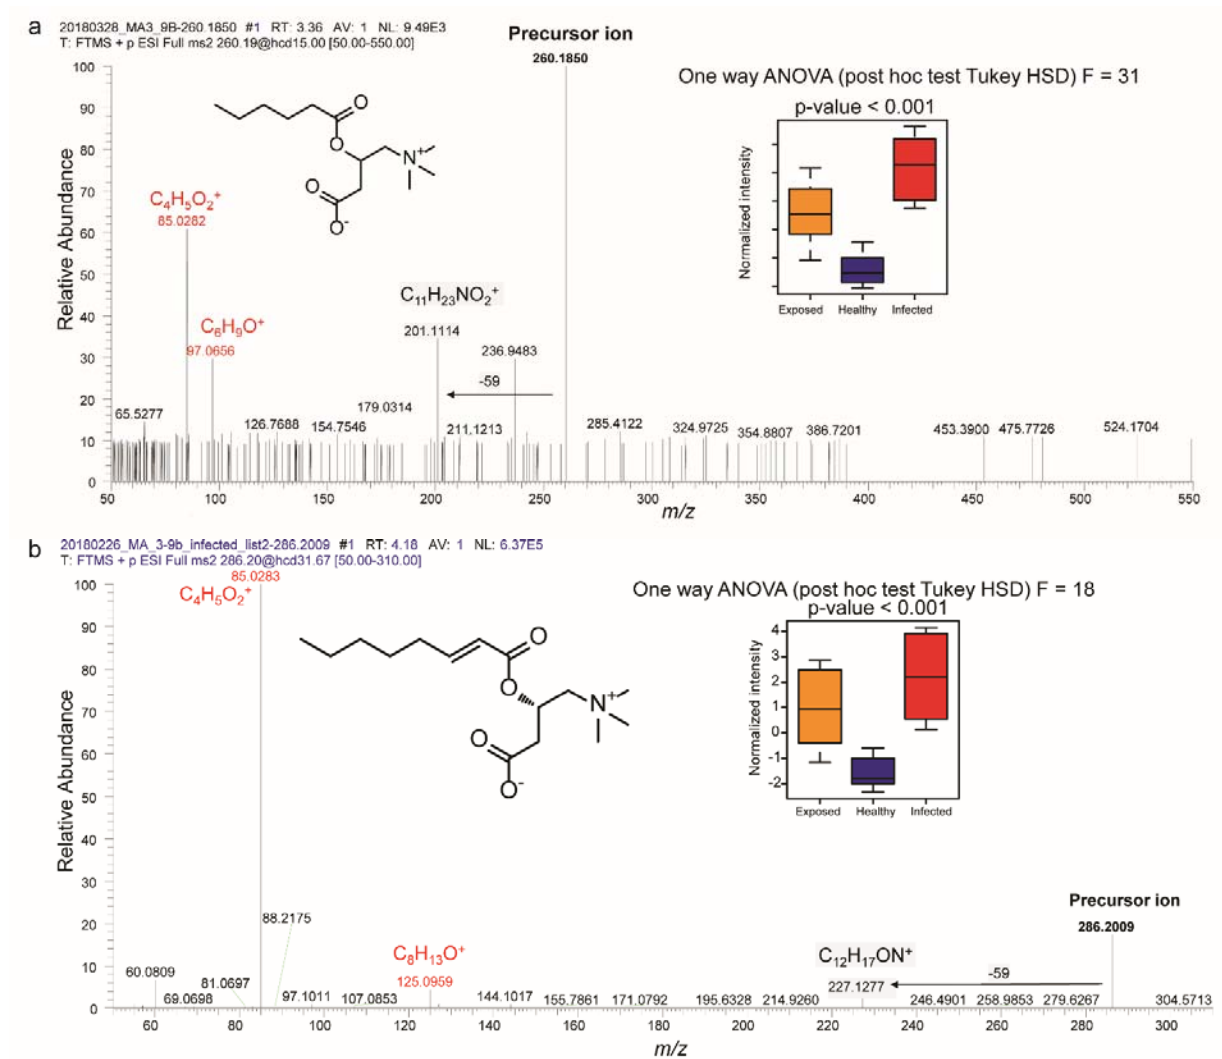

**Supplementary Figure 12.** MS/MS spectra from infected extract and ANOVA results for Lysophosphatidylcholines a) 18:2 b) 14:0 c) 16:1 d) 20:5. MS/MS characteristic fragments are

supported by Suárez-García et al., Development and validation of a UHPLC-ESI-MS/MS method for the simultaneous quantification of mammal lysophosphatidylcholines and lysophosphatidylethanolamines in serum.<sup>4</sup> The box-plots are displayed with the maximum, minimum, median lines and first/third quartiles and the samples as points.

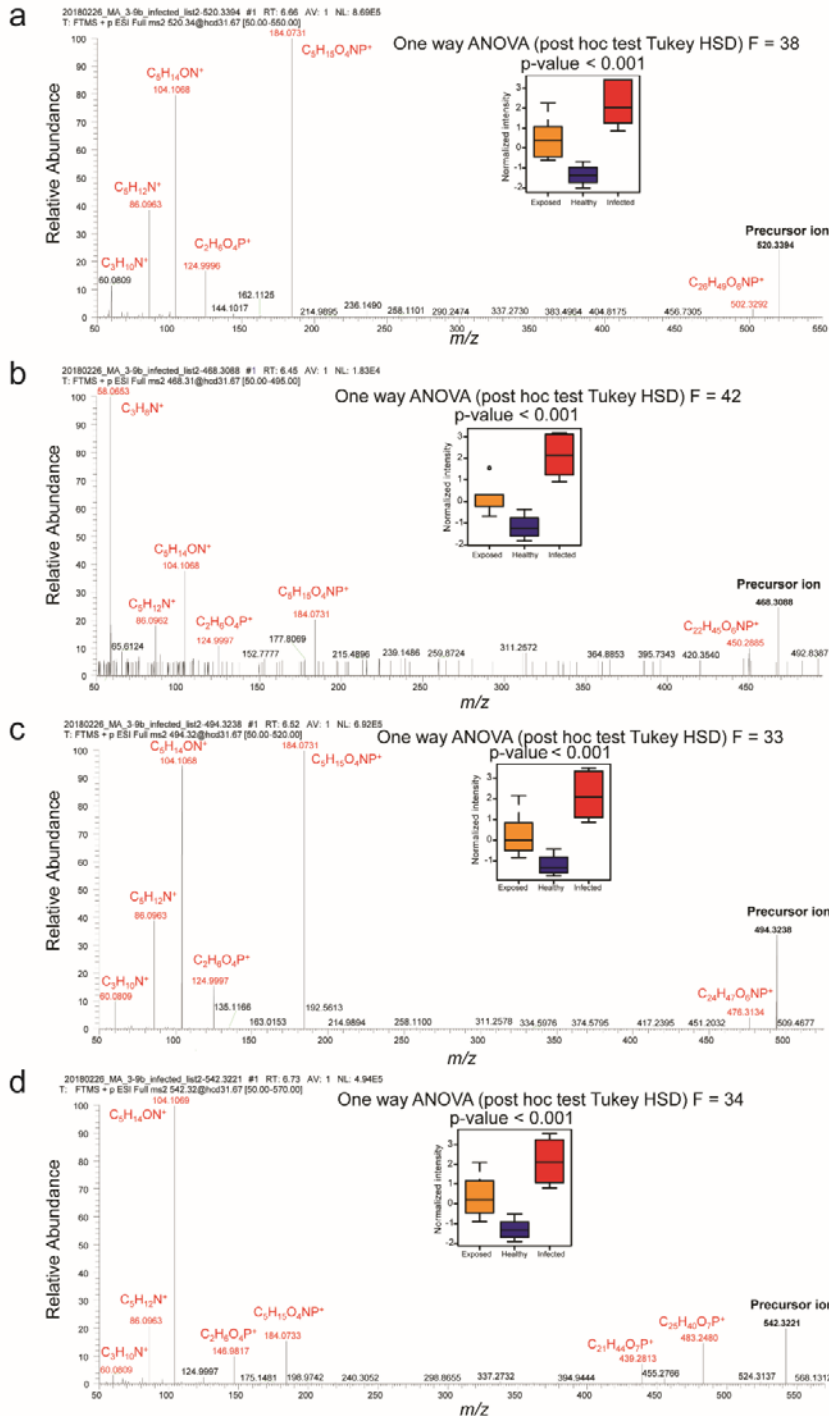

**Supplementary Figure 13.** MS/MS spectra from infected extract and ANOVA results for Lysophosphatidylcholines a) 20:4 b) 22:6 c) 22:5. The box-plots are displayed with the maximum, minimum, median lines and first/third quartiles and the samples as points.

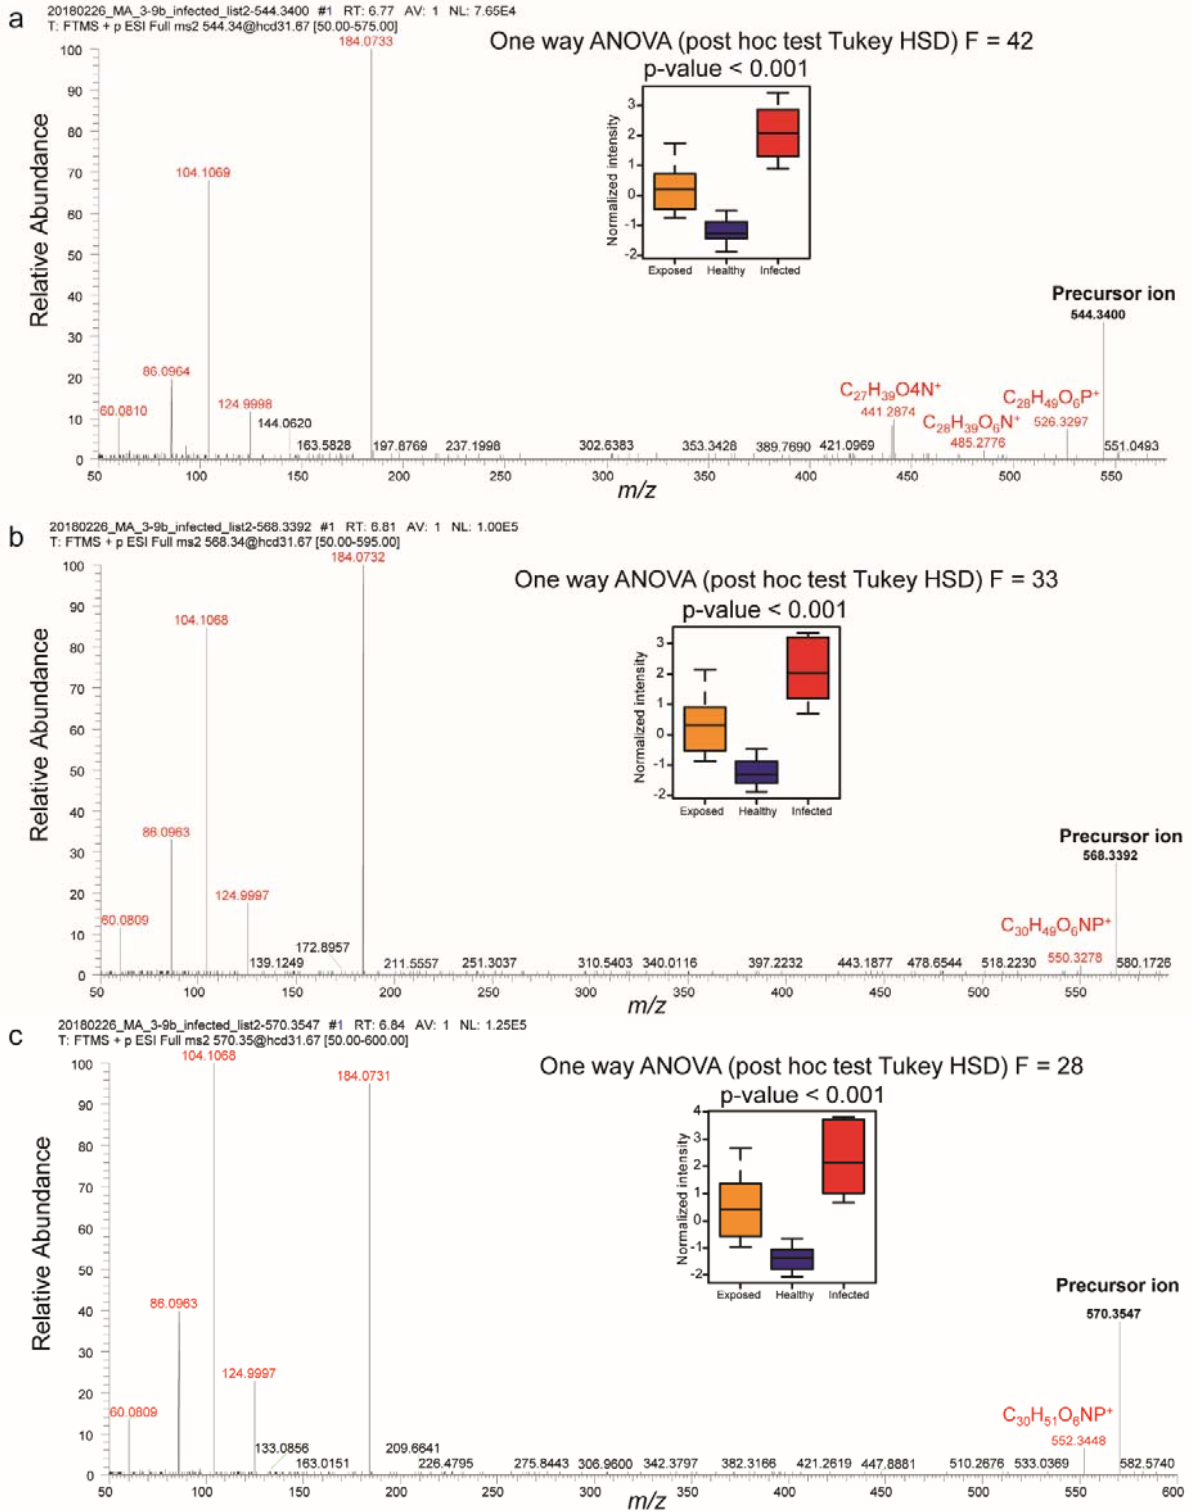



**Supplementary Figure 14.** a) MS and b) MS/MS spectra from infected extract with ANOVA result for the metabolite  $C_{10}H_7Cl_2N$ . The box-plots are displayed with the maximum, minimum, median lines and first/third quartiles and the samples as points.

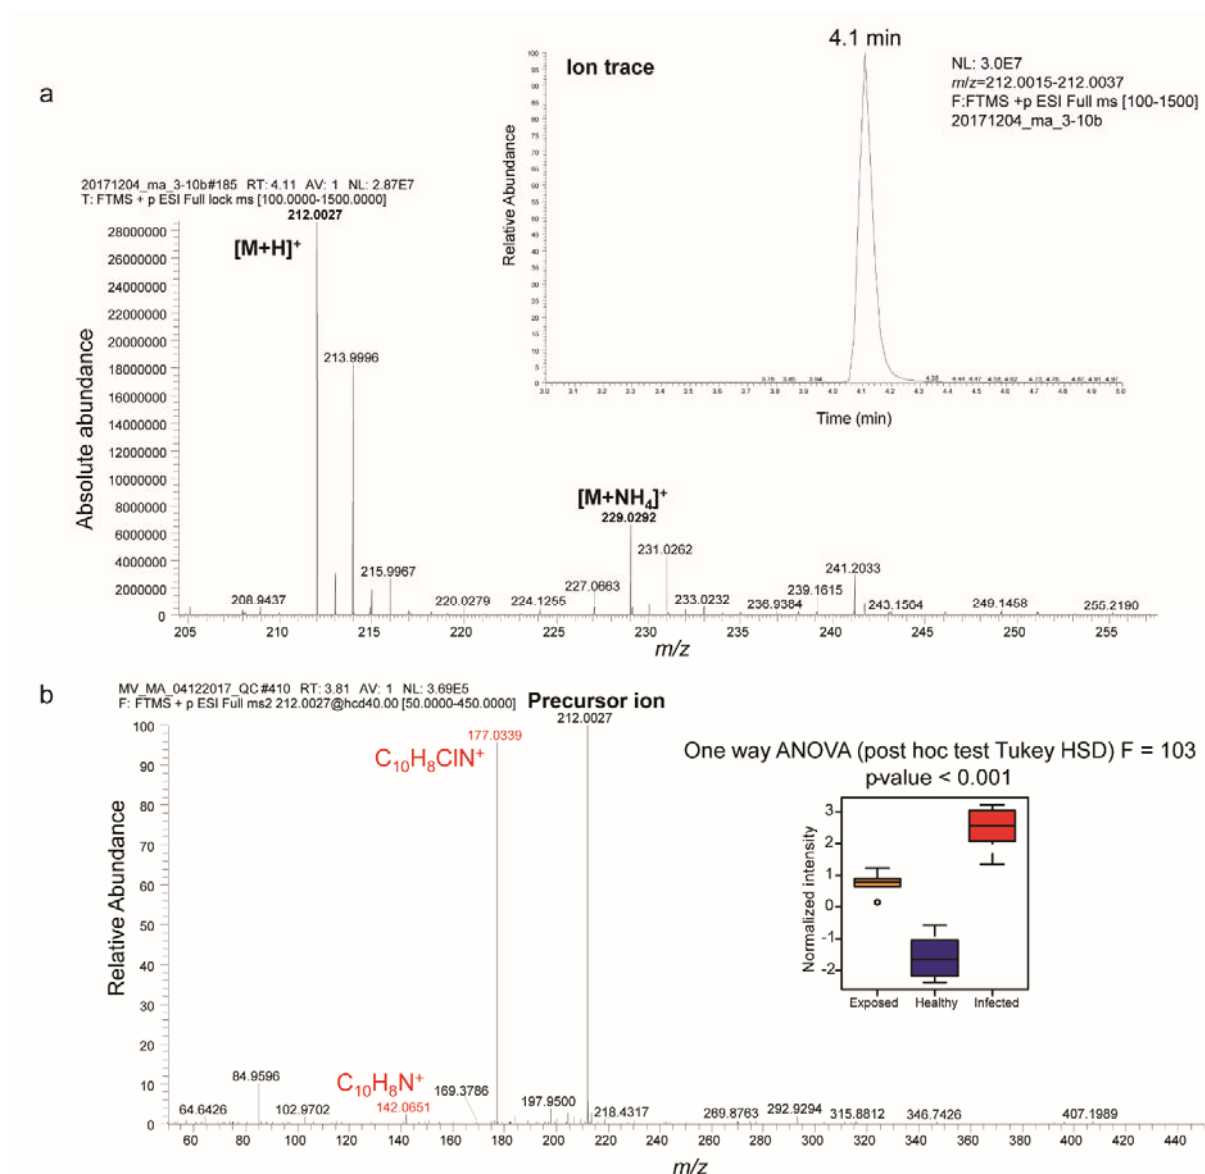

### Supplementary References

1 Crotti, A. E., Gates, P. J., Lopes, J. L. & Lopes, N. P. Electrospray MS-based characterization of  $\beta$ -carbolines – mutagenic constituents of thermally processed meat. *Molecular Nutrition & Food Research* 54: 433-439 (2010)

2 Suárez-García, S., Arola, L., Pascual-Serrano, A., Arola-Arnal, A., Aragones, Bladé, C., Suárez, M. Development and validation of a UHPLC-ESI-MS/MS method for the simultaneous quantification of mammal lysophosphatidylcholines and lysophosphatidylethanolamines in serum *J. Chrom. B* 1055-1056: 86-97 (2017).

3 Cho, S.-H., Lee J., Lee W. Y., Chung B. C. Direct determination of acylcarnitines in amniotic fluid by column - switching liquid chromatography with electrospray tandem mass spectrometry *Rapid Commun. Mass Spectrom.* **20**, 1741-1746 (2006).

4 Suárez-García, S. Arola, L., Pascual-Serrano, A., Arola-Arnal, A., Aragonés, G., Bladé, C., Suárez, M. Development and validation of a UHPLC-ESI-MS/MS method for the simultaneous quantification of mammal lysophosphatidylcholines and lysophosphatidylethanolamines in serum. *J. Chrom. B* 1055–1056: 86-97 (2017).
