# Supplementary material for: The oomycete Lagenisma coscinodisci hijacks host alkaloid synthesis during infection of a marine diatom
Source: PubMed Central journal article supplement (PMC6821873; doi:10.1038/s41467-019-12908-w), 2019-10-30
Supplement: 41467_2019_12908_MOESM3_ESM.pdf [file 41467_2019_12908_MOESM3_ESM.pdf]

## Description of Additional Supplementary Files

File Name: Supplementary Movie 1

Description: Release of *Lagenisma coscinodisci*'s zoospores through an exit tube. Video speed was increased by 8 times.
